# Supplementary material for: Multiscale modeling of layer formation in epidermis
Source: PubMed Central journal article supplement (PMC5843350; doi:10.1371/journal.pcbi.1006006), 2018-02-26
Supplement: pcbi.1006006.s001.pdf [file pcbi.1006006.s001.pdf]

# Multiscale modeling of layer formation in epidermis

Huijing Du<sup>1</sup>, Yangyang Wang<sup>2,3</sup>, Daniel Haensel<sup>3,4</sup>, Briana Lee<sup>3,4</sup>, Xing Dai<sup>3,4</sup>, Qing Nie<sup>2,3,\*</sup>

<sup>1</sup>Department of Mathematics, University of Nebraska-Lincoln, Lincoln, NE 68588, USA

<sup>2</sup>Department of Mathematics, University of California Irvine, Irvine, CA 92697, USA

<sup>3</sup>Center for Complex Biological Systems, University of California Irvine, Irvine, CA 92697, USA

<sup>4</sup>Department of Biological Chemistry, School of Medicine, University of California Irvine, Irvine, CA 92697, USA

\*Co-corresponding: [qnie@math.uci.edu](mailto:qnie@math.uci.edu)

## S1 Text: Multi-stage non-spatial cell lineage model

### A. A four-stage epidermal lineage model

Simplifying epidermal development into a cell lineage model of four different cell stages, the equations governing the size of the cell populations in the epidermis are

$$\begin{aligned}\frac{dC_0}{dt} &= (2p_0 - 1)v_0C_0, \\ \frac{dC_1}{dt} &= 2(1 - p_0)v_0C_0 + (2p_1 - 1)v_1C_1, \\ \frac{dC_2}{dt} &= 2(1 - p_1)v_1C_1 - d_2C_2, \\ \frac{dC_3}{dt} &= d_2C_2 - d_3C_3,\end{aligned}$$

where  $C_0$ ,  $C_1$ ,  $C_2$ , and  $C_3$  represent quantities of  $K14^+$  basal cells,  $K1^+$  proliferative spinous cells,  $K1^+$  terminally proliferated spinous cells, and loricrin<sup>+</sup> granular cells, respectively [1]. The definitions of  $p_0$ ,  $p_1$ ,  $d_2$ ,  $d_3$ ,  $v_0$  and  $v_1$  are as described in the main text. We did not consider cell death in this model, as we did not detect appreciable apoptotic activities in either WT or *Ovol* mutant epidermis.

For the system to achieve a steady state, the requirement  $p_0 \rightarrow \frac{1}{2}$  as  $t \rightarrow \infty$  must be maintained to prevent exponential growth or the extinguishment of the stem cell population and of the tissue as a whole. When  $p_0 > \frac{1}{2}$ ,  $dC_0/dt$  is positive, growth of the basal layer occurs. On the other hand, when  $p_0 < \frac{1}{2}$ ,  $dC_0/dt$  is negative, the basal layer shrinks in size.

Our study is primarily focused on development of the epidermis prior to full maturation. In this scenario, the epidermal lineage system may not reach a steady state, and growth of the basal layer occurs. As a result, we studied the system at a dynamic state after approximately 50 cell cycles (corresponding to  $t = 35$ ) and took values for  $p_0$  exceeding  $\frac{1}{2}$ .

## **B. Sensitivity analysis**

(1) A sensitivity analysis reveals that as either  $p_0$  or  $\nu_0$  increases, the sizes of the basal, spinous and granular layers increase (Fig A). No other parameters affect the size of the basal layer since  $p_0$  and  $\nu_0$  are the only parameters describing behavior of cells in the basal layer. As  $p_0$  or  $\nu_0$  increases, both the spinous and granular layers increase in size. But the gradient of the basal layer growth behaves differently as  $p_0$  or  $\nu_0$  increases.

(2) An increase in  $p_1$  prompts an increase in both the spinous layer and the granular layer. However, an increase in  $\nu_1$  prompts an increase in the granular layer while having little effect on the size of the spinous layer.

(3) Lastly, an increase in  $d_2$  leads to an increase in the size of the spinous layer while the size of the granular layer decreases. And an increase in  $d_3$  prompts a decrease in the granular layer while having little effect on the size of the spinous layer.

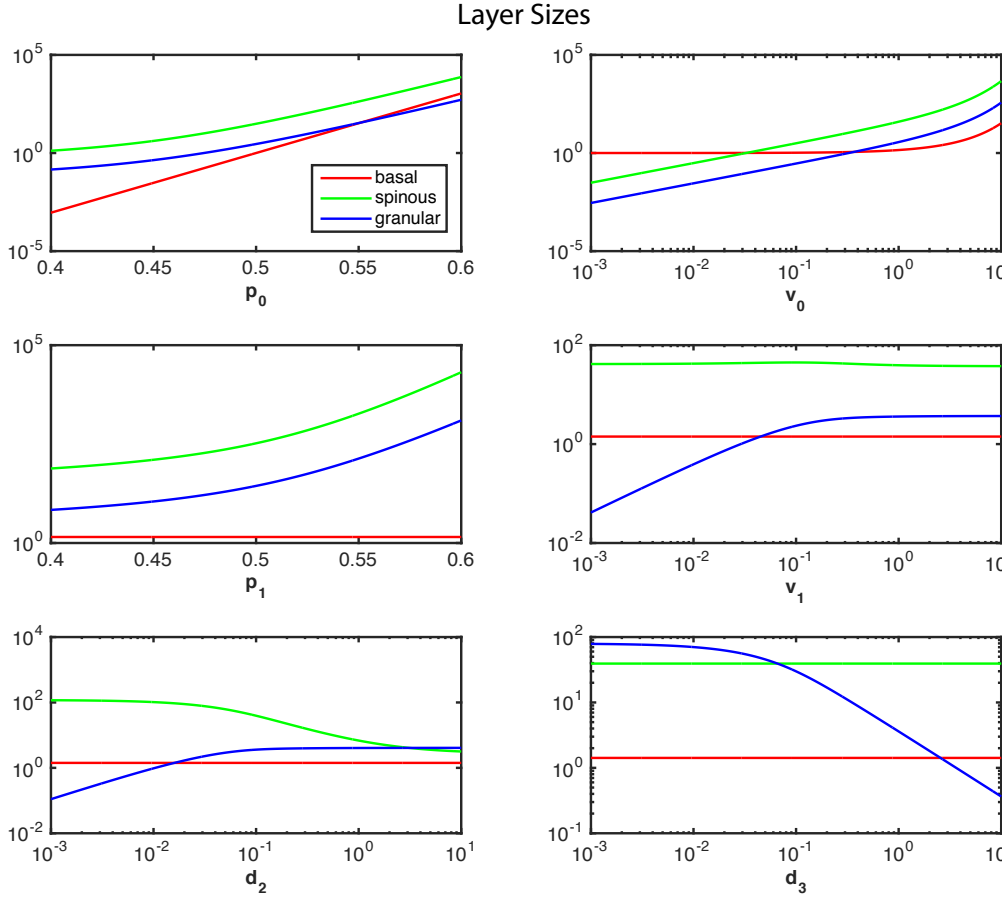

**Figure A:** Dependence of cell population sizes of different epidermal layers on  $p_0$ ,  $v_0$ ,  $p_1$ ,  $v_1$ ,  $d_2$  and  $d_3$  values (at time  $t=35$ ). The sizes of the basal, spinous, and granular layers are given by  $C_0$ ,  $C_1+C_2$ , and  $C_3$ , respectively. Corresponding parameters chosen are:  $p_0=0.515$ ,  $p_1=0.215$ ,  $v_0=v_1=1$ ,  $d_2=0.1$ , and  $d_3=1$ . Initial conditions:  $C_0(t=0)=1$  and  $C_1(t=0)=C_2(t=0)=C_3(t=0)=0$ .

### C. Incorporating *Ovol* into the lineage model

Based on the skin phenotypes of gain- and loss-of function *Ovol* mutants (*Ovol1*<sup>-/-</sup>, *Ovol2* SSKO, *Ovol2* BT, and *Ovol* DKO), we hypothesize that *Ovol1* and *Ovol2* hold the potential to down-regulate  $p_0$  (i.e., promote K14<sup>+</sup> to K1<sup>+</sup> transition),  $p_1$  (i.e., promote growth arrest of K1<sup>+</sup> cells),  $v_0$  (i.e., inhibit the proliferation rate of K14<sup>+</sup> cells),  $v_1$  (i.e., inhibit the proliferation rate of K1<sup>+</sup> cells), and/or up-regulate  $d_2$  (i.e., promote the terminal differentiation of K14<sup>+</sup> and K1<sup>+</sup> stem/progenitor cells into granular cells).

### D. *Ovol*'s inhibition of $v_0$ and $p_0$

Since  $dC_0/dt$  is linearly dependent upon  $C_0$ , the size of the basal layer can be solved by

$$C_0(t) = e^{(2p_0-1)v_0 t}$$

When  $p_0 > \frac{1}{2}$ , as corresponding to a developmental parameter regime, the basal layer size then increases exponentially with respect to both  $v_0$  and  $p_0$ .

The expanded basal compartment in *Ovol* DKO epidermis suggests increased  $v_0$  or  $p_0$ . When *Ovol1* and *Ovol2* act redundantly to inhibit  $v_0$  or  $p_0$ , the values of  $v_0$  and  $p_0$  may be near the respective wild-type values in *Ovol1*<sup>-/-</sup>, *Ovol2* SSKO, and *Ovol2* BT epidermis by compensatory mutual repression of *Ovol1* and *Ovol2* while  $v_0$  and  $p_0$  may be very high in the *Ovol* DKO epidermis due to loss of repression altogether. This would then result in expansion of the basal layer in *Ovol* DKO epidermis while a normal-sized basal layer is maintained in the epidermis of all other mutants.

Following the above analysis,  $p_0$  and  $v_0$  are inhibited upon quantities of *Ovol1* ( $\alpha$ ) and *Ovol2* ( $\beta$ ) expression levels,

$$p_0 = p_{\min} + \frac{p_T}{1 + \lambda\alpha + \mu\beta},$$

$$v_0 = v_{\min} + \frac{v_T}{1 + \omega\alpha + \chi\beta}.$$

### E. *Ovol*'s stimulation of $d_2$

In the sensitivity analysis of the epidermal lineage model, it was noted that only changes in the parameter  $d_2$  result in opposite effects of spinous and granular layer sizes. More specifically, when  $d_2$  is near the range 0.1-1 using the parameters for simulations, a slight decrease in  $d_2$  leads to an expansion of the spinous layers and little change in the size of the granular layers as observed in *Ovol1*<sup>-/-</sup> epidermis. An increase in  $d_2$  in this range also leads to a shrinking in the size of the spinous layers and less significant changes in the size of the granular layers, as observed in the *Ovol2* BT epidermis. A large decrease in  $d_2$  in this range will then prompt both an increase in the size of the spinous layers and a decrease in the granular layers, as observed in *Ovol* DKO epidermis. Ultimately, these observations prompt the following speculations of how *Ovol* might regulate  $d_2$ :

- $d_2$  is lower in *Ovol1*<sup>-/-</sup> epidermis than in the wild type.
- $d_2$  is relatively unchanged in *Ovol2* SSKO epidermis in comparison to the wild type.
- $d_2$  is higher in *Ovol2* BT epidermis than in the wild type.
- $d_2$  is significantly lower in *Ovol* DKO epidermis than in the wild type.

Suppose that  $d_2$  assumes the following linear functional form dependent upon quantities of *Ovol1* ( $\alpha$ ) and *Ovol2* ( $\beta$ ) expression levels,

$$d_2 = d_{DKO} + \zeta\alpha + \xi\beta$$

Using this form for  $d_2$ , when the *Ovol* expression levels increase, the value of  $d_2$  also increases. Now, if we interpret the speculated levels of *Ovol1* and *Ovol2* in the *Ovol*-deficient and BT epidermis using this functional form and the variables is defined in Table 1, then we have the following relations,

$$\begin{aligned}\zeta a + \xi b &> \xi c, \\ \zeta a + \xi b &\approx \zeta d, \\ \zeta a + \xi b &> \zeta g + \xi h, \\ \zeta a + \xi b &> 0,\end{aligned}$$

along with the constraint  $b > c$  to yield results that may mimic the experimental data. From these formulated relations above, we can deduce that  $\xi c > \zeta d$ , which indicates that the response that  $d_2$  receives from *Ovol2* in *Ovol1*<sup>-/-</sup> epidermis is greater than the response from *Ovol1* in *Ovol2*<sup>-/-</sup> epidermis. This notion suggests that either *Ovol1* represses *Ovol2* in a stronger fashion than *Ovol2* represses *Ovol1* or  $d_2$  is more sensitive to *Ovol2* than to *Ovol1*.

### F. Assumption of *Ovol1* represses *Ovol2* in a stronger fashion than *Ovol2* represses *Ovol1* in their mutual inhibition

The expression level of *Ovol1* ( $\alpha$ ) and *Ovol2* ( $\beta$ ) can be represented as

|                       |                           | WT      | <i>Ovol1</i> <sup>-/-</sup> | <i>Ovol2</i><br>SSKO | <i>Ovol2</i> BT     | <i>Ovol</i><br>DKO |
|-----------------------|---------------------------|---------|-----------------------------|----------------------|---------------------|--------------------|
| Experimental findings | <i>Ovol1</i>              | $a$     | 0                           | $d$                  | $g$                 | 0                  |
|                       | <i>Ovol2</i>              | $b$     | $c$                         | 0                    | $h$                 | 0                  |
|                       | Relations                 |         | $c > b$                     | $d > a$              | $g < a,$<br>$h > b$ |                    |
| Model assumption      | <i>Ovol1</i> ( $\alpha$ ) | $a = 1$ | 0                           | $d = 1.6$            | $g = 0.5$           | 0                  |
|                       | <i>Ovol2</i> ( $\beta$ )  | $b = 1$ | $c = 1.25$                  | 0                    | $h = 10$            | 0                  |

**Table A:** Summary of *Ovol*'s expression in experiments and models.

### G. Two models explaining epidermal phenotypes through two *Ovol* regulations

Our analysis has so far suggested that *Ovol*'s down-regulation of either  $v_0$  or  $p_0$  has the potential to explain the observed changes (or lack of changes) in basal layer size and that *Ovol*'s up-regulation of  $d_2$  may explain the observed changes in spinous and granular layer sizes in *Ovol* mutant skin. Then, we would like to explore all the possible feedbacks of *Ovol* regulation on proliferation and differentiation in Fig B.

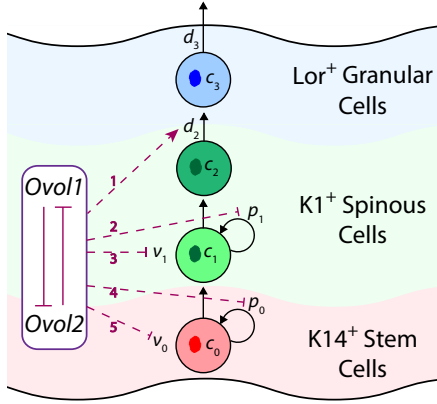

**Figure B:** A schematic diagram shows *Ovol* regulation of epidermal cell proliferation and differentiation. Red dashed lines represents the potential regulation relationships between the *Ovol* genes and components of the cell lineage model.

|                                                                                    |
|------------------------------------------------------------------------------------|
| $\downarrow p_0 + \uparrow d_2$                                                    |
| $\downarrow p_0 + \uparrow d_2 + \downarrow v_0$                                   |
| $\downarrow p_0 + \uparrow d_2 + \downarrow p_1$                                   |
| $\downarrow p_0 + \uparrow d_2 + \downarrow v_1$                                   |
| $\downarrow p_0 + \uparrow d_2 + \downarrow v_0 + \downarrow p_1$                  |
| $\downarrow p_0 + \uparrow d_2 + \downarrow v_0 + \downarrow v_1$                  |
| $\downarrow p_0 + \uparrow d_2 + \downarrow p_1 + \downarrow v_1$                  |
| $\downarrow p_0 + \uparrow d_2 + \downarrow v_0 + \downarrow p_1 + \downarrow v_1$ |
| $\downarrow v_0 + \uparrow d_2$                                                    |
| $\downarrow v_0 + \uparrow d_2 + \downarrow p_1$                                   |
| $\downarrow v_0 + \uparrow d_2 + \downarrow v_1$                                   |
| $\downarrow v_0 + \uparrow d_2 + \downarrow p_1 + \downarrow v_1$                  |

**Table B:** Summary of all possible combinations of *Ovol* regulation of proliferation and differentiation that can explain epidermal phenotypes in experiments.

All the *Ovol* regulations that can capture the epidermal phenotypes are listed in Table B. This intuitive exploration of feedback loops shows that *Ovol* down-regulation of  $p_0$  or  $v_0$  and its up-regulation of  $d_2$  are the key components (Model 1 and Model 2 below). And with the assistance of other feedback loops, there exist several more complex models (for example Model 3) also capable to reproduce the experimental observation.

Model 1: *Ovol1* and *Ovol2* inhibit  $p_0$  and up-regulate  $d_2$  through the functional forms,

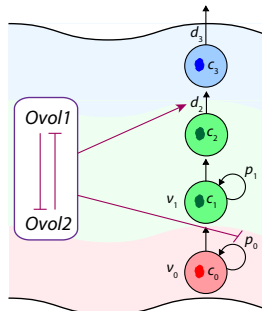

$$p_0 = p_{\min} + \frac{p_T}{1 + \lambda\alpha + \mu\beta},$$

$$d_2 = d_{DKO} + \zeta\alpha + \xi\beta$$

Model 2: *Ovol1* and *Ovol2* inhibit  $v_0$  and up-regulate  $d_2$  through the functional forms,

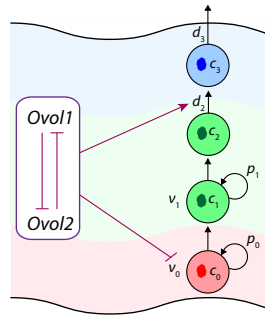

$$v_0 = v_{\min} + \frac{v_T}{1 + \omega\alpha + \chi\beta},$$

$$d_2 = d_{DKO} + \zeta\alpha + \xi\beta.$$

Model 3: *Ovol1* and *Ovol2* inhibit  $v_0$  and  $p_1$ , and up-regulate  $d_2$  through the functional forms,

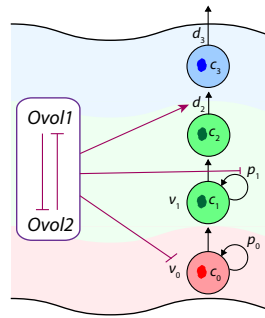

$$v_0 = v_{\min} + \frac{v_T}{1 + \omega\alpha + \chi\beta},$$

$$p_1 = p_{\min} + \frac{p_T}{1 + \lambda\alpha + \mu\beta},$$

$$d_2 = d_{DKO} + \zeta\alpha + \xi\beta.$$

In all three models we assume that *Ovol1* and *Ovol2* inhibit the expression of one another.

All models can recapitulate the experimentally observed phenotypes of *Ovol*-deficient and -overexpressing epidermis (Tables C, D and E). Note that Model 3 also incorporates inhibition of  $p_1$  from *Ovol1* and *Ovol2*, although the majority of the phenotypes may be explained by inhibition of  $v_0$  and upregulation of  $d_2$  alone as in Model 2.

| Model 1                         | WT      |   | <i>Ovol1</i> <sup>-/-</sup> |   | <i>Ovol2</i> SSKO |   | <i>Ovol2</i> BT |   | <i>Ovol</i> DKO |   |
|---------------------------------|---------|---|-----------------------------|---|-------------------|---|-----------------|---|-----------------|---|
| K14 <sup>+</sup> basal layer    | 1.60    | — | 1.87                        | — | 1.72              | — | 1.13            | — | 4.06            | ↑ |
| K1 <sup>+</sup> spinous layer   | 8.18    | — | 17.50                       | ↑ | 8.37              | — | 3.08            | ↓ | 169.14          | ↑ |
| Lor <sup>+</sup> granular layer | 4.11    | — | 4.56                        | — | 4.38              | — | 3.07            | ↓ | 1.55            | ↓ |
| <i>Ovol1</i> ( $\alpha$ )       | $a = 1$ |   | 0                           |   | $d = 1.6$         |   | $g = 0.5$       |   | 0               |   |
| <i>Ovol2</i> ( $\beta$ )        | $b = 1$ |   | $c = 1.25$                  |   | 0                 |   | $h = 10$        |   | 0               |   |

**Table C:** Results from Model 1 with *Ovol*'s down-regulation of  $p_0$  and up-regulation of  $d_2$ . Corresponding parameters chosen are:  $p_1=0.215$ ,  $v_0=v_1=1$ ,  $d_3=1$ ,  $p_{\min}=0.5$ ,  $p_T=0.02$ ,  $\lambda=\mu=1$ ,  $d_{DKO}=10^{-2}$ ,  $\zeta=0.5$  and  $\xi=0.25$ . Simulation ran up to time  $t = 35$ .

| Model 2                         | WT      |   | <i>Ovol1</i> <sup>-/-</sup> |   | <i>Ovol2</i> SSKO |   | <i>Ovol2</i> BT |   | <i>Ovol</i> DKO |   |
|---------------------------------|---------|---|-----------------------------|---|-------------------|---|-----------------|---|-----------------|---|
| K14 <sup>+</sup> basal layer    | 2.81    | — | 2.90                        | — | 2.85              | — | 2.59            | — | 3.35            | ↑ |
| K1 <sup>+</sup> spinous layer   | 13.37   | — | 25.78                       | ↑ | 13.17             | — | 4.27            | ↓ | 174.80          | ↑ |
| Lor <sup>+</sup> granular layer | 6.57    | — | 6.59                        | — | 6.75              | — | 5.80            | ↓ | 1.61            | ↓ |
| <i>Ovol1</i> ( $\alpha$ )       | $a = 1$ |   | 0                           |   | $d = 1.6$         |   | $g = 0.5$       |   | 0               |   |
| <i>Ovol2</i> ( $\beta$ )        | $b = 1$ |   | $c = 1.25$                  |   | 0                 |   | $h = 50$        |   | 0               |   |

**Table D:** Results from Model 2 with *Ovol*'s down-regulation of  $v_0$  and up-regulation of  $d_2$ . Corresponding parameters chosen are:  $p_0=0.515$ ,  $p_1=0.215$ ,  $v_1=1$ ,  $d_3=1$ ,  $v_{\min}=0.9$ ,  $v_T=0.25$ ,  $\omega=\chi=1$ ,  $d_{DKO}=10^{-2}$ ,  $\zeta=0.5$  and  $\xi=0.25$ . Simulation ran up to time  $t = 35$ .

| Model 3                         | WT      |   | <i>Ovol1</i> <sup>-/-</sup> |   | <i>Ovol2</i> SSKO |   | <i>Ovol2</i> BT |   | <i>Ovol</i> DKO |   |
|---------------------------------|---------|---|-----------------------------|---|-------------------|---|-----------------|---|-----------------|---|
| K14 <sup>+</sup> basal layer    | 2.86    | — | 2.99                        | — | 2.92              | — | 2.64            | — | 4.35            | ↑ |
| K1 <sup>+</sup> spinous layer   | 15.97   | — | 33.52                       | ↑ | 16.47             | — | 6.22            | ↓ | 472.21          | ↑ |
| Lor <sup>+</sup> granular layer | 7.66    | — | 8.39                        | — | 8.19              | — | 6.01            | ↓ | 4.24            | ↓ |
| <i>Ovol1</i> ( $\alpha$ )       | $a = 1$ |   | 0                           |   | $d = 1.6$         |   | $g = 0.5$       |   | 0               |   |
| <i>Ovol2</i> ( $\beta$ )        | $b = 1$ |   | $c = 1.25$                  |   | 0                 |   | $h = 10$        |   | 0               |   |

**Table E:** Results from Model 3 with *Ovol*'s down-regulation of  $v_0$  and  $p_1$  and up-regulation of  $d_2$ . Corresponding parameters chosen are:  $p_0=0.515$ ,  $v_1=1$ ,  $d_3=1$ ,  $v_{\min}=0.9$ ,  $v_T=0.5$ ,  $\omega=\chi=2$ ,  $p_{\min}=p_T=0.2$ ,  $\lambda=\mu=1$ ,  $d_{DKO}=10^{-2}$ ,  $\zeta=0.5$  and  $\xi=0.25$ . Simulation ran up to time  $t = 35$ .

|                |                   |                                                                                                                                        |
|----------------|-------------------|----------------------------------------------------------------------------------------------------------------------------------------|
| <b>Model 1</b> | Initial condition | $c_0=1, c_1=c_2=c_3=0$                                                                                                                 |
|                | Parameter values  | $p_1=0.215, v_0=v_1=1, d_3=1, p_{\min}=0.5, p_T=0.02, \lambda=\mu=1, d_{DKO}=10^{-2}, \zeta=0.5, \xi=0.25$                             |
| <b>Model 2</b> | Initial condition | $c_0=1, c_1=c_2=c_3=0$                                                                                                                 |
|                | Parameter values  | $p_0=0.515, p_1=0.215, v_1=1, d_3=1, v_{\min}=0.9, v_T=0.25, \omega=\chi=1, d_{DKO}=10^{-2}, \zeta=0.5, \xi=0.25$                      |
| <b>Model 3</b> | Initial condition | $c_0=1, c_1=c_2=c_3=0$                                                                                                                 |
|                | Parameter values  | $p_0=0.515, v_1=1, d_3=1, v_{\min}=0.9, v_T=0.5, \omega=\chi=2, p_{\min}=p_T=0.2, \lambda=\mu=1, d_{DKO}=10^{-2}, \zeta=0.5, \xi=0.25$ |

**Table F:** Initial condition and parameter values of the multistage cell lineage model.

## SUPPLEMENTAL REFERENCES

1. Lander AD, Gokoffski KK, Wan FY, Nie Q, Calof AL. Cell lineages and the logic of proliferative control. PLoS Biol. 2009;7(1):e15.
